# Supplementary material for: Impact of Hypertension on COVID-19 Burden in Kidney Transplant Recipients: An Observational Cohort Study
Source: MDPI journal article supplement (doi:10.3390/v14112409), 2022-10-30
Supplement: s1 [file s1]

**Figure S1.** Flowchart of patients included for selection of study patients. DGF = Delayed graft function.

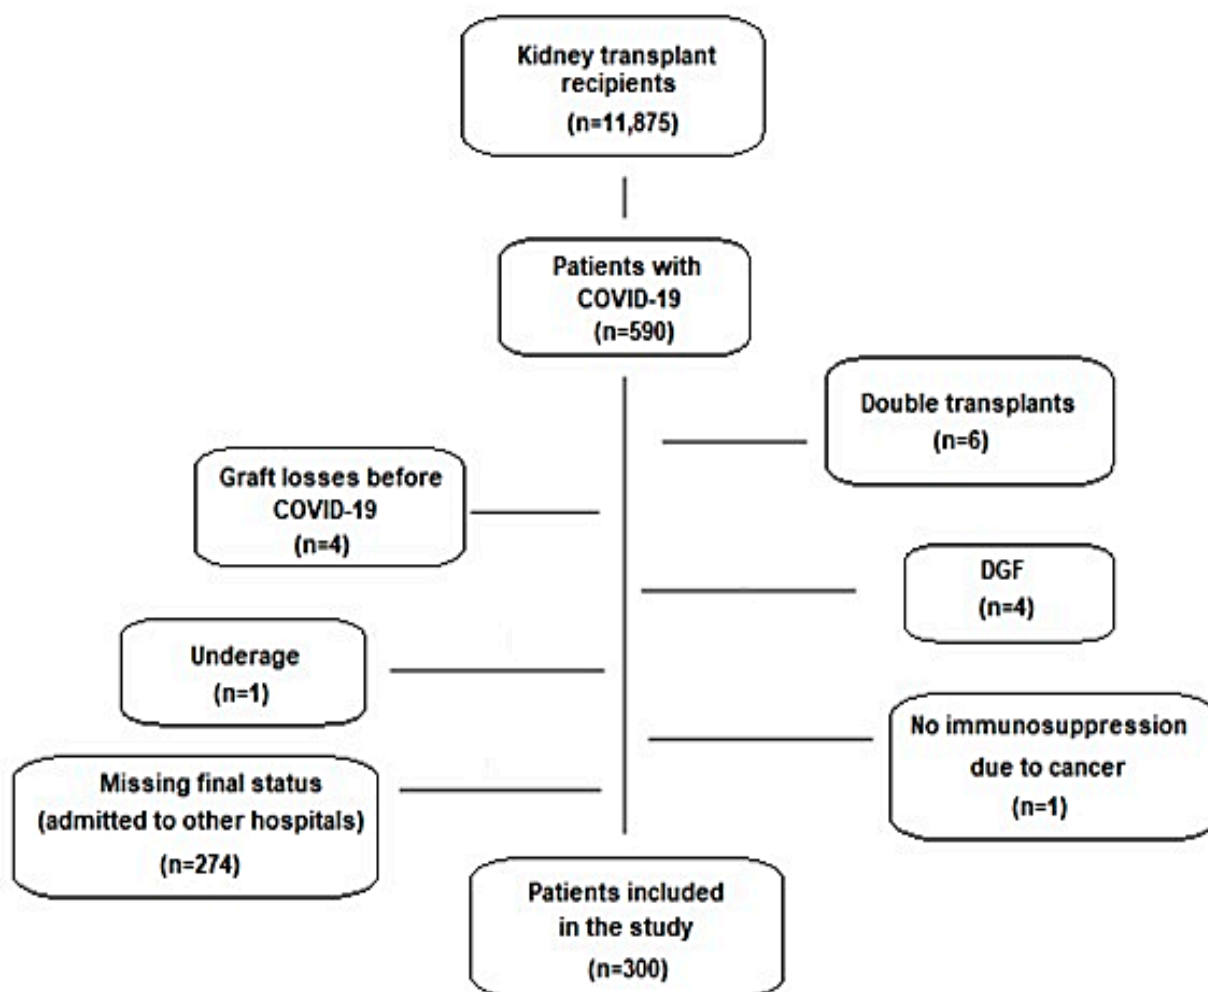

Univariable and multivariable analyses of the outcomes in kidney transplant recipients (Tables 1S-5S).

**Table S1.** Risk factors for mortality in kidney transplant recipients.

|                                | NOT ALIVE<br>(n=89, 29.7%) | ALIVE<br>(n=211, 70.3%) | Univariable analysis                    | Multivariable analysis                  |
|--------------------------------|----------------------------|-------------------------|-----------------------------------------|-----------------------------------------|
| <b>Demographic data</b>        |                            |                         |                                         |                                         |
| Age (years)                    | 58.8±10.9                  | 49.8±11.7               | 1.07 (1.045-1.097, <b>p&lt;0.0001</b> ) | 1.05 (1.024-1.084, <b>p&lt;0.0001</b> ) |
| Male (n, %)                    | 54 (60.7)                  | 118 (55.9)              | 1.22 (0.734-2.014, p=0.448)             |                                         |
| Race (n, %)                    |                            |                         |                                         |                                         |
| White                          | 55 (61.8)                  | 129 (61.1)              | 1.03 (0.618-1.711, p=0.915)             |                                         |
| Black/brown                    | 30 (33.7)                  | 80 (37.9)               |                                         |                                         |
| Transplant time (months)       | 85 (41;138)                | 71 (31.5;142.5)         | 1.00 (0.998-1.005, p=0.493)             |                                         |
| Donor type (n, %)              |                            |                         |                                         |                                         |
| Living                         | 20 (22.5)                  | 65 (30.8)               | 1.54 (0.862-2.736, p=0.145)             |                                         |
| Deceased                       | 69 (77.5)                  | 146 (69.2)              |                                         |                                         |
| BMI (kg/m <sup>2</sup> )       | 27.1±4.7                   | 26.8±5.0                | 1.01 (0.958-1.064, p=0.721)             |                                         |
| BMI ≥ 25 (n, %)                | 38 (42.7)                  | 82 (38.9)               | 1.19 (0.711-1.987, p=0.510)             |                                         |
| BMI ≥ 30 (n, %)                | 21 (23.6)                  | 44 (20.9)               | 1.19 (0.655-2.159, p=0.569)             |                                         |
| HTN (n, %)                     | 74 (83.1)                  | 151 (71.6)              | 1.96 (1.044-3.682, <b>p=0.036</b> )     | 1.71 (0.787-3.699, p=0.176)             |
| DM (n, %)                      | 46 (51.7)                  | 71 (33.6)               | 2.11 (1.274-3.493, <b>p=0.004</b> )     | 1.11 (0.579-2.132, p=0.753)             |
| COPD (n, %)                    | 3 (3.4)                    | 6 (2.8)                 | 1.19 (0.291-4.875, p=0.807)             |                                         |
| Heart disease (n, %)           | 18 (20.2)                  | 14 (6.6)                | 3.57 (1.686-7.547, <b>p=0.001</b> )     | 3.10 (1.163-8.247, <b>p=0.024</b> )     |
| Neoplasia (n, %)               | 10 (11.2)                  | 11 (5.2)                | 2.30 (0.940-5.633, p=0.068)             | 1.95 (0.521-7.281, p=0.322)             |
| Liver disease (n, %)           | 5 (5.6)                    | 4 (1.9)                 | 3.08 (0.807-11.752, p=0.100)            |                                         |
| Autoimmune disease (n, %)      | 2 (2.2)                    | 4 (1.9)                 | 1.19 (0.214-6.616, p=0.843)             |                                         |
| Smoking (n, %)                 | 26 (29.2)                  | 36 (17.1)               | 2.06 (1.126-3.767, <b>p=0.019</b> )     | 1.87 (0.967-3.596, p=0.063)             |
| <b>Laboratory data</b>         |                            |                         |                                         |                                         |
| Basal eGFR                     | 48.2 (26.5;60.4)           | 46.8 (32.2;64.4)        | 1.00 (0.986-1.007, p=0.462)             |                                         |
| Admission eGFR                 | 29 (16.9;44.5)             | 37.1 (22;52.1)          | 0.99 (0.977-1.001, p=0.070)             | 1.00 (0.979-1.018, p=0.845)             |
| Previous glycemia (mg/dL)      | 110.5 (91.5;171.8)         | 92 (83;112)             | 1.01 (1.004-1.013, <b>p&lt;0.0001</b> ) | 1.01 (0.999-1.011, p=0.120)             |
| CRP (mg/dL)                    | 12 (5.5;18.8)              | 4.4 (1.5;10.1)          | 1.08 (1.047-1.121, <b>p&lt;0.0001</b> ) | 1.03 (0.982-1.090, p=0.205)             |
| LDH (U/L)                      | 353 (277.3;459.8)          | 265 (210;351.5)         | 1.00 (1.001-1.004, <b>p=0.004</b> )     | 1.00 (0.999-1.003, p=0.155)             |
| Lymphocytes (mm <sup>3</sup> ) | 548 (356.5;836)            | 847 (575.3;1212.3)      | 1.00 (0.999-1.000, <b>p=0.013</b> )     | 1.00 (0.998-1.000, p=0.041)             |
| D-dimer (µg/L)                 | 1.4 (0.7;2.7)              | 1.1 (0.5;2.0)           | 1.13 (1.041-1.215, <b>p=0.003</b> )     | 1.17 (1.005-1.367, <b>p=0.043</b> )     |
| AST (U/L)                      | 34 (21;44.5)               | 28 (21;40)              | 1.00 (0.996-1.011, p=0.353)             |                                         |
| ALT (U/L)                      | 24 (15;33)                 | 21 (15;29)              | 1.00 (0.991-1.013, p=0.700)             |                                         |

BMI: body mass index; HTN: hypertension; DM: diabetes mellitus; COPD: chronic obstructive pulmonary disease; eGFR: estimated glomerular filtration rate (in mL/min/1.73 m<sup>2</sup>); CRP: C-reactive protein; LDH: lactate dehydrogenase; AST: aspartate aminotransferase; ALT: alanine aminotransferase. Age and BMI are means ± SD, while transplant time, basal eGFR, admission eGFR, previous glycemia, CRP, LDH, lymphocytes, D-dimer, AST, and ALT are medians and IQR. Univariable and multivariable analyses are represented by odds ratios, 95% confidence intervals, and *P*-values, respectively.

**Table S2.** Risk factors for intensive care unit (ICU) admission in kidney transplant recipients.

|                                | ICU<br>(n=140, 46.7%) | No ICU<br>(n=160, 53.3%) | Univariable analysis                    | Multivariable analysis               |
|--------------------------------|-----------------------|--------------------------|-----------------------------------------|--------------------------------------|
| <b>Demographic data</b>        |                       |                          |                                         |                                      |
| Age (years)                    | 56.5±11.7             | 49.0±11.5                | 1.06 (1.035-1.080, <b>p&lt;0.0001</b> ) | 1.04 (1.013-1.064, <b>p=0.003</b> )  |
| Male (n, %)                    | 79 (56.4)             | 93 (58.1)                | 0.93 (0.590-1.476, p=0.767)             |                                      |
| Race (n, %)                    |                       |                          |                                         |                                      |
| White                          | 88 (62.9)             | 96 (60.0)                | 1.13 (0.708-1.799, p=0.612)             |                                      |
| Black/brown                    | 47 (33.6)             | 63 (39.4)                |                                         |                                      |
| Transplant time (months)       | 84 (35.8;135)         | 71.5 (31.8;143.3)        | 1.00 (0.997-1.003, p=0.944)             |                                      |
| Donor type (n, %)              |                       |                          |                                         |                                      |
| Living                         | 40 (28.6)             | 45 (28.1)                | 0.98 (0.591-1.618, p=0.932)             |                                      |
| Deceased                       | 100 (71.4)            | 115 (71.9)               |                                         |                                      |
| BMI (kg/m <sup>2</sup> )       | 27.3±4.8              | 26.5±4.9                 | 1.04 (0.987-1.087, p=0.156)             |                                      |
| BMI ≥ 25 (n, %)                | 57 (40.7)             | 63 (39.4)                | 1.02 (0.638-1.638, p=0.927)             |                                      |
| BMI ≥ 30 (n, %)                | 35 (25.0)             | 30 (18.8)                | 1.43 (0.818-2.485, p=0.210)             |                                      |
| HTN (n, %)                     | 114 (81.4)            | 111 (69.4)               | 1.94 (1.125-3.330, <b>p=0.017</b> )     | 1.69 (0.885-3.222, p=0.112)          |
| DM (n, %)                      | 64 (45.7)             | 53 (33.1)                | 1.70 (1.065-2.714, <b>p=0.026</b> )     | 1.03 (0.564-1.876, p=0.928)          |
| COPD (n, %)                    | 6 (4.3)               | 3 (1.9)                  | 2.34 (0.575-9.550, p=0.235)             |                                      |
| Heart disease (n, %)           | 24 (17.1)             | 8 (5.0)                  | 3.93 (1.704-9.068, <b>p=0.001</b> )     | 3.55 (1.108-11.378, <b>p=0.033</b> ) |
| Neoplasia (n, %)               | 15 (10.7)             | 6 (3.8)                  | 3.08 (1.161-8.171, <b>p=0.024</b> )     | 2.90 (0.686-12.237, p=0.148)         |
| Liver disease (n, %)           | 6 (4.3)               | 3 (1.9)                  | 2.34 (0.575-9.550, p=0.235)             |                                      |
| Autoimmune disease (n, %)      | 5 (3.6)               | 1 (0.6)                  | 5.89 (0.680-51.025, p=0.108)            |                                      |
| Smoking (n, %)                 | 36 (25.7)             | 26 (16.3)                | 1.67 (0.933-2.995, p=0.084)             | 1.53 (0.820-2.840, p=0.182)          |
| <b>Laboratory data</b>         |                       |                          |                                         |                                      |
| Basal eGFR                     | 45.3 (28.2;60)        | 47.9 (32.2;65)           | 1.00 (0.985-1.004, p=0.273)             |                                      |
| Admission eGFR                 | 29 (17.1;45)          | 39.4 (25.3;52.7)         | 0.98 (0.974-0.995, <b>p=0.005</b> )     | 0.98 (0.958-0.997, <b>p=0.027</b> )  |
| Previous glycemia (mg/dL)      | 105 (89;158.5)        | 92 (82;105.5)            | 1.01 (1.004-1.014, <b>p&lt;0.0001</b> ) | 1.00 (0.997-1.010, p=0.278)          |
| CRP (mg/dL)                    | 9.9 (4.2;16.6)        | 3.7 (1.2;9.6)            | 1.08 (1.039-1.112, <b>p&lt;0.0001</b> ) | 1.00 (0.938-1.063, p=0.967)          |
| LDH (U/L)                      | 347 (252.5;475)       | 247.5 (203.5;308)        | 1.01 (1.003-1.007, <b>p&lt;0.0001</b> ) | 1.01 (1.001-1.010, <b>p=0.017</b> )  |
| Lymphocytes (mm <sup>3</sup> ) | 585 (377;890.3)       | 895 (619;1232)           | 1.00 (0.999-1.000, <b>p=0.020</b> )     | 1.00 (0.998-1.000, <b>p=0.046</b> )  |
| D-dimer (µg/L)                 | 1.5 (0.8;2.7)         | 0.9 (0.5;1.7)            | 1.15 (1.047-1.272, p=0.004)             | 1.22 (0.979-1.518, p=0.077)          |
| AST (U/L)                      | 31 (21;42)            | 28 (21;39)               | 1.01 (0.999-1.018, p=0.082)             | 0.99 (0.975-1.010, p=0.378)          |
| ALT (U/L)                      | 21.5 (14;31.8)        | 21 (15;31.8)             | 1.00 (0.990-1.010, p=0.984)             |                                      |

BMI: body mass index; HTN: hypertension; DM: diabetes mellitus; COPD: chronic obstructive pulmonary disease; eGFR: estimated glomerular filtration rate (in mL/min/1.73 m<sup>2</sup>); CRP: C-reactive protein; LDH: lactate dehydrogenase; AST: aspartate aminotransferase; ALT: alanine aminotransferase. Age and BMI are means ± SD, while transplant time, basal eGFR, admission eGFR, previous glycemia, CRP, LDH, lymphocytes, D-dimer, AST, and ALT are medians and IQR. Univariable and multivariable analyses are represented by odds ratios, 95% confidence intervals, and *P*-values, respectively.

**Table S3.** Risk factors for the need for hemodialysis (HD) admission in kidney transplant recipients.

|                                | <b>HD<br/>(n=109, 36.3%)</b> | <b>No HD<br/>(n=191, 63.7%)</b> | <b>Univariable analysis</b>             | <b>Multivariable analysis</b>       |
|--------------------------------|------------------------------|---------------------------------|-----------------------------------------|-------------------------------------|
| <b>Demographic data</b>        |                              |                                 |                                         |                                     |
| Age (years)                    | 55.6±11.8                    | 50.7±12.1                       | 1.04 (1.014-1.057, <b>p=0.001</b> )     | 1.03 (1.004-1.050, <b>p=0.021</b> ) |
| Male (n, %)                    | 66 (60.6)                    | 106 (55.5)                      | 1.23 (0.763-1.986, p=0.395)             |                                     |
| Race (n, %)                    |                              |                                 |                                         |                                     |
| White                          | 70 (64.2)                    | 114 (59.7)                      | 1.21 (0.745-1.973, p=0.438)             |                                     |
| Black/brown                    | 35 (32.1)                    | 75 (39.3)                       |                                         |                                     |
| Transplant time (months)       | 85 (35;127)                  | 73 (32.5;145)                   | 1.00 (0.996-1.003, p=0.803)             |                                     |
| Donor type (n, %)              |                              |                                 |                                         |                                     |
| Living                         | 24 (22.0)                    | 61 (31.9)                       | 1.66 (0.963-2.868, p=0.068)             | 1.51 (0.847-2.675, p=0.163)         |
| Deceased                       | 85 (78.0)                    | 130 (68.1)                      |                                         |                                     |
| BMI (kg/m <sup>2</sup> )       | 27.1±4.6                     | 26.8±5.1                        | 1.01 (0.965-1.065, p=0.589)             |                                     |
| BMI ≥ 25 (n, %)                | 43 (39.4)                    | 77 (40.3)                       | 0.92 (0.564-1.498, p=0.734)             |                                     |
| BMI ≥ 30 (n, %)                | 27 (24.8)                    | 38 (19.9)                       | 1.29 (0.735-2.277, p=0.372)             |                                     |
| HTN (n, %)                     | 91 (83.5)                    | 134 (70.2)                      | 2.15 (1.188-3.891, <b>p=0.011</b> )     | 1.75 (0.937-3.260, p=0.079)         |
| DM (n, %)                      | 51 (46.8)                    | 66 (34.6)                       | 1.67 (1.030-2.692, <b>p=0.037</b> )     | 1.11 (0.653-1.895, p=0.696)         |
| COPD (n, %)                    | 5 (4.6)                      | 4 (2.1)                         | 2.25 (0.591-8.553, p=0.235)             |                                     |
| Heart disease (n, %)           | 18 (16.5)                    | 14 (7.3)                        | 2.50 (1.190-5.256, <b>p=0.016</b> )     | 1.68 (0.767-3.690, p=0.195)         |
| Neoplasia (n, %)               | 11 (10.1)                    | 10 (5.2)                        | 2.03 (0.834-4.952, p=0.119)             |                                     |
| Liver disease (n, %)           | 7 (6.4)                      | 2 (1.0)                         | 6.49 (1.323-31.796, <b>p=0.021</b> )    | 4.19 (0.830-21.177, p=0.083)        |
| Autoimmune disease (n, %)      | 3 (2.8)                      | 3 (1.6)                         | 1.77 (0.352-8.943, p=0.488)             |                                     |
| Smoking (n, %)                 | 29 (26.6)                    | 33 (17.3)                       | 1.50 (0.835-2.679, p=0.176)             |                                     |
| <b>Laboratory data</b>         |                              |                                 |                                         |                                     |
| Basal eGFR                     | 41.5 (21.8;56.7)             | 50.6 (35.1;67.3)                | 0.98 (0.974-.995, <b>p=0.003</b> )      | 1.00 (0.981-1.020, p=0.992)         |
| Admission eGFR                 | 23.5 (12.8;40.0)             | 40.6 (26;54.1)                  | 0.97 (0.956-0.981, <b>p&lt;0.0001</b> ) | 0.98 (0.952-0.999, <b>p=0.043</b> ) |
| Previous glycemia (mg/dL)      | 105 (90;149.5)               | 92 (83;111)                     | 1.01 (1.004-1.013, <b>p&lt;0.0001</b> ) | 1.00 (0.997-1.009, p=0.323)         |
| CRP (mg/dL)                    | 10.2 (4.3;16.9)              | 4.4 (1.4;10.0)                  | 1.05 (1.021-1.086, <b>p=0.001</b> )     | 1.00 (0.947-1.048, p=0.882)         |
| LDH (U/L)                      | 351.5 (247.3;488.3)          | 265 (211;345.5)                 | 1.00 (1.001-1.004, <b>p=0.002</b> )     | 1.00 (1.000-1.004, p=0.071)         |
| Lymphocytes (mm <sup>3</sup> ) | 546.5 (377;843)              | 864 (597.5;1219.5)              | 1.00 (0.999-1.000, p=0.056)             | 1.00 (0.997-1.000, <b>p=0.005</b> ) |
| D-dimer (µg/L)                 | 1.3 (0.7;2.6)                | 1.1 (0.5;2.0)                   | 1.07 (0.996-1.150, p=0.064)             | 1.13 (0.973-1.304, p=0.111)         |
| AST (U/L)                      | 30 (20;42)                   | 28 (22;40)                      | 1.00 (0.995-1.009, p=0.553)             |                                     |
| ALT (U/L)                      | 23 (14;32.5)                 | 21 (15;31)                      | 1.00 (0.989-1.010, p=0.905)             |                                     |

BMI: body mass index; HTN: hypertension; DM: diabetes mellitus; COPD: chronic obstructive pulmonary disease; eGFR: estimated glomerular filtration rate (in mL/min/1.73 m<sup>2</sup>); CRP: C-reactive protein; LDH: lactate dehydrogenase; AST: aspartate aminotransferase; ALT: alanine aminotransferase. Age and BMI are means ± SD, while transplant time, basal eGFR, admission eGFR, previous glycemia, CRP, LDH, lymphocytes, D-dimer, AST, and ALT are medians and IQR. Univariable and multivariable analyses are represented by odds ratios, 95% confidence intervals, and *P*-values, respectively.

**Table S4.** Risk factors for the use of supplemental oxygen (O<sub>2</sub>) admission in kidney transplant recipients.

|                                | <b>O<sub>2</sub></b><br><b>(n=163, 54.3%)</b> | <b>No O<sub>2</sub></b><br><b>(n=137, 45.7%)</b> | <b>Univariable analysis</b>             | <b>Multivariable analysis</b>           |
|--------------------------------|-----------------------------------------------|--------------------------------------------------|-----------------------------------------|-----------------------------------------|
| <b>Demographic data</b>        |                                               |                                                  |                                         |                                         |
| Age (years)                    | 55.5±12.0                                     | 48.9±11.5                                        | 1.05 (1.027-1.071, <b>p&lt;0.0001</b> ) | 1.05 (1.024-1.078, <b>p&lt;0.0001</b> ) |
| Male (n, %)                    | 89 (54.6)                                     | 83 (60.6)                                        | 0.78 (0.493-1.241, p=0.297)             |                                         |
| Race (n, %)                    |                                               |                                                  |                                         |                                         |
| White                          | 103 (63.2)                                    | 81 (59.1)                                        | 1.19 (0.745-1.892, p=0.471)             |                                         |
| Black/brown                    | 57 (35.0)                                     | 53 (38.7)                                        |                                         |                                         |
| Transplant time (months)       | 73 (38.5;128.5)                               | 89 (31;148)                                      | 1.00 (0.997-1.003, p=0.848)             |                                         |
| Donor type (n, %)              |                                               |                                                  |                                         |                                         |
| Living                         | 43 (26.4)                                     | 42 (30.7)                                        | 1.23 (0.746-2.041, p=0.413)             |                                         |
| Deceased                       | 120 (73.6)                                    | 95 (69.3)                                        |                                         |                                         |
| BMI (kg/m <sup>2</sup> )       | 27.5±4.9                                      | 26.2±4.8                                         | 1.06 (1.005-1.110, <b>p=0.030</b> )     | 1.06 (0.968-1.156, p=0.212)             |
| BMI ≥ 25 (n, %)                | 67 (41.1)                                     | 53 (38.7)                                        | 1.15 (0.714-1.840, p=0.571)             |                                         |
| BMI ≥ 30 (n, %)                | 41 (25.2)                                     | 24 (17.5)                                        | 1.65 (0.933-2.910, p=0.085)             | 1.00 (0.367-2.717, p=0.998)             |
| HTN (n, %)                     | 122 (74.8)                                    | 103 (75.2)                                       | 0.98 (0.581-1.660, p=0.947)             |                                         |
| DM (n, %)                      | 72 (44.2)                                     | 45 (32.8)                                        | 1.62 (1.009-2.593, <b>p=0.046</b> )     | 0.99 (0.535-1.815, p=0.961)             |
| COPD (n, %)                    | 7 (4.3)                                       | 2 (1.5)                                          | 3.03 (0.619-14.827, p=0.171)            |                                         |
| Heart disease (n, %)           | 19 (11.7)                                     | 13 (9.5)                                         | 1.26 (0.597-2.652, p=0.545)             |                                         |
| Neoplasia (n, %)               | 14 (8.6)                                      | 7 (5.1)                                          | 1.75 (0.683-4.455, p=0.244)             |                                         |
| Liver disease (n, %)           | 8 (4.9)                                       | 1 (0.7)                                          | 7.02 (0.867-56.840, p=0.068)            | 3.42 (0.393-29.710, p=0.266)            |
| Autoimmune disease (n, %)      | 4 (2.5)                                       | 2 (1.5)                                          | 1.70 (0.306-9.415, p=0.545)             |                                         |
| Smoking (n, %)                 | 44 (27.0)                                     | 18 (13.1)                                        | 1.26 (1.216-4.210, <b>p=0.010</b> )     | 1.86 (0.951-3.626, p=0.070)             |
| <b>Laboratory data</b>         |                                               |                                                  |                                         |                                         |
| Basal eGFR                     | 46.2 (29.4;64.3)                              | 47.8 (31.8;63.9)                                 | 1.00 (0.987-1.006, p=0.434)             |                                         |
| Admission eGFR                 | 30.4 (17.7;46.4)                              | 39.3 (22.5;52.5)                                 | 0.99 (0.978-0.998, <b>p=0.025</b> )     | 0.99 (0.972-1.004, p=0.143)             |
| Previous glycemia (mg/dL)      | 101 (87;137)                                  | 92 (83;111)                                      | 1.00 (1.000-1.008, p=0.070)             | 1.00 (0.993-1.004, p=0.700)             |
| CRP (mg/dL)                    | 9.0 (4.1;15.4)                                | 3.2 (1.1;9.6)                                    | 1.06 (1.028-1.101, <b>p&lt;0.0001</b> ) | 1.06 (1.002-1.116, <b>p=0.041</b> )     |
| LDH (U/L)                      | 337 (241.5;433)                               | 239 (182.8;303.8)                                | 1.00 (1.002-1.007, <b>p&lt;0.0001</b> ) | 1.00 (0.998-1.004, p=0.377)             |
| Lymphocytes (mm <sup>3</sup> ) | 653 (409.3;958.5)                             | 895 (588;1325)                                   | 1.00 (0.999-1.000, <b>p=0.001</b> )     | 1.00 (0.999-1.000, p=0.092)             |
| D-dimer (µg/L)                 | 1.2 (0.6;2.3)                                 | 1.2 (0.5;2.1)                                    | 1.03 (0.958-1.110, p=0.411)             |                                         |
| AST (U/L)                      | 29.5 (20;43.8)                                | 28 (22.5;37)                                     | 1.01 (1.000-1.022, p=0.057)             | 1.01 (0.972-1.004, p=0.143)             |
| ALT (U/L)                      | 21 (13.8;33)                                  | 21 (16;29.3)                                     | 1.01 (0.996-1.018, p=0.234)             |                                         |

BMI: body mass index; HTN: hypertension; DM: diabetes mellitus; COPD: chronic obstructive pulmonary disease; eGFR: estimated glomerular filtration rate (in mL/min/1.73 m<sup>2</sup>); CRP: C-reactive protein; LDH: lactate dehydrogenase; AST: aspartate aminotransferase; ALT: alanine aminotransferase. Age and BMI are means ± SD, while transplant time, basal eGFR, admission eGFR, previous glycemia, CRP, LDH, lymphocytes, D-dimer, AST, and ALT are medians and IQR. Univariable and multivariable analyses are represented by odds ratios, 95% confidence intervals, and *P*-values, respectively.

**Table S5.** Risk factors for the need for invasive mechanical ventilation (IMV) admission in kidney transplant recipients.

|                                | IMV<br>(n=102, 34%) | No IMV<br>(n=198, 66%) | Univariable analysis                    | Multivariable analysis              |
|--------------------------------|---------------------|------------------------|-----------------------------------------|-------------------------------------|
| <b>Demographic data</b>        |                     |                        |                                         |                                     |
| Age (years)                    | 57.4±10.6           | 49.9±12.2              | 1.06 (1.034-1.081, <b>p&lt;0.0001</b> ) | 1.04 (1.014-1.069, <b>p=0.002</b> ) |
| Male (n, %)                    | 64 (62.7)           | 108 (54.5)             | 1.40 (0.860-2.289, p=0.174)             |                                     |
| Race (n, %)                    |                     |                        |                                         |                                     |
| White                          | 63 (61.8)           | 121 (61.1)             | 1.03 (0.629-1.680, p=0.912)             |                                     |
| Black/brown                    | 34 (33.3)           | 76 (38.4)              |                                         |                                     |
| Transplant time (months)       | 84 (38.3;133)       | 72.5 (32;143.8)        | 1.00 (0.996-1.003, p=0.917)             |                                     |
| Donor type (n, %)              |                     |                        |                                         |                                     |
| Living                         | 24 (23.5)           | 61 (30.8)              | 1.45 (0.837-2.503, p=0.186)             |                                     |
| Deceased                       | 78 (76.5)           | 137 (69.2)             |                                         |                                     |
| BMI (kg/m <sup>2</sup> )       | 27.5±4.5            | 26.6±5.0               | 1.04 (0.990-1.094, p=0.121)             |                                     |
| BMI ≥ 25 (n, %)                | 44 (43.1)           | 76 (38.4)              | 1.21 (0.739-1.989, p=0.445)             |                                     |
| BMI ≥ 30 (n, %)                | 26 (25.5)           | 39 (19.7)              | 1.40 (0.790-2.477, p=0.249)             |                                     |
| HTN (n, %)                     | 83 (81.4)           | 142 (71.7)             | 1.72 (0.958-3.097, p=0.069)             | 1.50 (0.739-3.046, p=0.262)         |
| DM (n, %)                      | 52 (51.0)           | 65 (32.8)              | 2.13 (1.306-3.469, <b>p=0.002</b> )     | 1.27 (0.686-2.356, p=0.445)         |
| COPD (n, %)                    | 4 (3.9)             | 5 (2.5)                | 1.58 (0.414-5.999, p=0.505)             |                                     |
| Heart disease (n, %)           | 18 (17.6)           | 14 (7.1)               | 2.82 (1.338-5.930, <b>p=0.006</b> )     | 2.19 (0.824-5.808, p=0.116)         |
| Neoplasia (n, %)               | 12 (11.8)           | 9 (4.5)                | 2.80 (1.138-6.887, <b>p=0.025</b> )     | 3.54 (0.906-13.856, p=0.069)        |
| Liver disease (n, %)           | 6 (5.9)             | 3 (1.5)                | 4.06 (0.995-16.595, p=0.051)            | 1.20 (0.232-6.152, p=0.831)         |
| Autoimmune disease (n, %)      | 2 (2.0)             | 4 (2.0)                | 0.97 (0.175-5.387, p=0.972)             |                                     |
| Smoking (n, %)                 | 29 (28.4)           | 33 (16.7)              | 1.86 (1.035-3.357, <b>p=0.038</b> )     | 1.70 (0.904-3.199, p=0.100)         |
| <b>Laboratory data</b>         |                     |                        |                                         |                                     |
| Basal eGFR                     | 46.2 (28.5;60.3)    | 47.2 (31.9;64.5)       | 1.00 (0.988-1.008, p=0.708)             |                                     |
| Admission eGFR                 | 29 (17.3;44.3)      | 37.5 (21.4;52.4)       | 1.00 (0.976-0.999, <b>p=0.036</b> )     | 1.00 (0.979-1.015, p=0.742)         |
| Previous glycemia (mg/dL)      | 114 (93;166)        | 92 (82.8;108)          | 1.01 (1.005-1.014, <b>p&lt;0.0001</b> ) | 1.01 (0.999-1.012, p=0.082)         |
| CRP (mg/dL)                    | 10.5 (5.0;17.1)     | 4.4 (1.5;9.8)          | 1.07 (1.031-1.099, <b>p&lt;0.0001</b> ) | 1.02 (0.973-1.074, p=0.383)         |
| LDH (U/L)                      | 359.5 (266;490.5)   | 263 (209;347)          | 1.00 (1.001-1.004, <b>p=0.001</b> )     | 1.00 (1.000-1.003, p=0.114)         |
| Lymphocytes (mm <sup>3</sup> ) | 523 (351.5;828.5)   | 865 (600.3;1236.3)     | 1.00 (0.999-1.000, <b>p=0.002</b> )     | 1.00 (0.998-1.000, <b>p=0.015</b> ) |
| D-dimer (µg/L)                 | 1.3 (0.7;2.6)       | 1.1 (0.5;2.0)          | 1.09 (1.014-1.175, <b>p=0.020</b> )     | 1.08 (0.928-1.248, p=0.330)         |
| AST (U/L)                      | 34 (21;42)          | 28 (21;40)             | 1.00 (0.996-1.010, p=0.455)             |                                     |
| ALT (U/L)                      | 24 (15.5;33)        | 21 (15;29)             | 1.00 (0.991-1.012, p=0.778)             |                                     |

BMI: body mass index; HTN: hypertension; DM: diabetes mellitus; COPD: chronic obstructive pulmonary disease; eGFR: estimated glomerular filtration rate (in mL/min/1.73 m<sup>2</sup>); CRP: C-reactive protein; LDH: lactate dehydrogenase; AST: aspartate aminotransferase; ALT: alanine aminotransferase. Age and BMI are means ± SD, while transplant time, basal eGFR, admission eGFR, previous glycemia, CRP, LDH, lymphocytes, D-dimer, AST, and ALT are medians and IQR. Univariable and multivariable analyses are represented by odds ratios, 95% confidence intervals, and *P*-values, respectively.

## Composite outcomes in kidney transplant recipients (Tables 6S-7S).

**Table S6.** Risk factors for composite outcomes of mortality, and ICU and HD in kidney transplant recipients.

|                                | <b>Composite Outcome<br/>(n=78, 26%)</b> | <b>No Composite Outcome<br/>(n=150, 50%)</b> | <b>Univariable analysis</b>             | <b>Multivariable analysis</b>       |
|--------------------------------|------------------------------------------|----------------------------------------------|-----------------------------------------|-------------------------------------|
| <b>Demographic data</b>        |                                          |                                              |                                         |                                     |
| Age (years)                    | 58.3±10.3                                | 48.8±11.4                                    | 1.06 (1.035-1.086, <b>p&lt;0.0001</b> ) | 1.05 (1.018-1.079, <b>p=0.001</b> ) |
| Male (n, %)                    | 47 (60.3)                                | 87 (58.0)                                    | 1.18 (0.696-1.990, p=0.544)             |                                     |
| Race (n, %)                    |                                          |                                              |                                         |                                     |
| White                          | 52 (66.7)                                | 90 (60.0)                                    | 1.36 (0.793-2.344, p=0.262)             |                                     |
| Black/brown                    | 23 (29.5)                                | 59 (39.3)                                    |                                         |                                     |
| Transplant time (months)       | 84 (41.3;126.8)                          | 71.5 (32.3;142.8)                            | 1.00 (0.997-1.004, p=0.898)             |                                     |
| Donor type (n, %)              |                                          |                                              |                                         |                                     |
| Living                         | 16 (20.5)                                | 45 (30.0)                                    | 1.75 (0.941-3.224, p=0.077)             | 1.00 (0.441-2.273, p=0.998)         |
| Deceased                       | 62 (79.5)                                | 105 (70.0)                                   |                                         |                                     |
| BMI (kg/m <sup>2</sup> )       | 27.4±4.4                                 | 26.7±4.8                                     | 1.03 (0.974-1.084, p=0.326)             |                                     |
| BMI ≥ 25 (n, %)                | 34 (43.6)                                | 61 (40.7)                                    | 1.19 (0.697-2.018, p=0.529)             |                                     |
| BMI ≥ 30 (n, %)                | 20 (25.6)                                | 29 (19.3)                                    | 1.33 (0.725-2.451, p=0.354)             |                                     |
| HTN (n, %)                     | 66 (84.6)                                | 103 (68.7)                                   | 2.18 (1.103-4.305, <b>p=0.025</b> )     | 2.01 (0.885-4.550, p=0.096)         |
| DM (n, %)                      | 39 (50.0)                                | 47 (31.3)                                    | 1.85 (1.095-3.113, <b>p=0.021</b> )     | 1.01 (0.517-1.987, p=0.969)         |
| COPD (n, %)                    | 3 (3.8)                                  | 3 (2.0)                                      | 1.44 (0.351-5.902, p=0.612)             |                                     |
| Heart disease (n, %)           | 17 (21.8)                                | 8 (5.3)                                      | 3.85 (1.815-8.148, <b>p&lt;0.0001</b> ) | 2.94 (1.121-7.732, <b>p=0.028</b> ) |
| Neoplasia (n, %)               | 10 (12.8)                                | 6 (4.0)                                      | 2.82 (1.148-6.931, <b>p=0.024</b> )     | 2.38 (0.623-9.053, p=0.205)         |
| Liver disease (n, %)           | 5 (6.4)                                  | 1 (0.7)                                      | 3.73 (0.976-14.274, p=0.054)            | 0.98 (0.190-5.053, p=0.981)         |
| Autoimmune disease (n, %)      | 2 (2.6)                                  | 0 (0)                                        | 1.43 (0.258-7.988, p=0.681)             |                                     |
| Smoking (n, %)                 | 24 (30.8)                                | 25 (16.7)                                    | 2.03 (1.096-3.749, <b>p=0.024</b> )     | 1.86 (0.956-3.630, p=0.067)         |
| <b>Laboratory data</b>         |                                          |                                              |                                         |                                     |
| Basal eGFR                     | 46.5 (25.2;59.5)                         | 50.1 (35.4;66.9)                             | 1.00 (0.984-1.006, p=0.332)             |                                     |
| Admission eGFR                 | 28.2 (16.8;44.3)                         | 41.3 (26.8;54.7)                             | 0.99 (0.976-1.001, p=0.061)             | 1.00 (0.984-1.024, p=0.713)         |
| Previous glycemia (mg/dL)      | 110 (92;191)                             | 92 (82;105)                                  | 1.01 (1.005-1.013, <b>p&lt;0.0001</b> ) | 1.01 (0.999-1.012, p=0.080)         |
| CRP (mg/dL)                    | 12 (5.9;18.3)                            | 3.7 (1.2;9.5)                                | 1.08 (1.040-1.114, <b>p&lt;0.0001</b> ) | 1.04 (0.985-1.096, p=0.158)         |
| LDH (U/L)                      | 360.5 (282.3;459.8)                      | 250 (201;309.5)                              | 1.00 (1.000-1.004, <b>p=0.010</b> )     | 1.00 (0.999-1.003, p=0.391)         |
| Lymphocytes (mm <sup>3</sup> ) | 534.5 (352.3;818.8)                      | 877 (632;1206)                               | 1.00 (0.999-1.000, <b>p=0.009</b> )     | 1.00 (0.997-1.000, <b>p=0.024</b> ) |
| D-dimer (μg/L)                 | 1.5 (0.8;2.7)                            | 0.9 (0.5;1.7)                                | 1.09 (1.017-1.176, <b>p=0.016</b> )     | 1.15 (0.983-1.338, p=0.081)         |
| AST (U/L)                      | 33 (21;43.3)                             | 28 (21.3;38.8)                               | 1.00 (0.996-1.011, p=0.325)             |                                     |
| ALT (U/L)                      | 24 (15;33)                               | 21 (15;32.5)                                 | 1.00 (0.992-1.014, p=0.575)             |                                     |

BMI: body mass index; HTN: hypertension; DM: diabetes mellitus; COPD: chronic obstructive pulmonary disease; eGFR: estimated glomerular filtration rate (in mL/min/1.73 m<sup>2</sup>); CRP: C-reactive protein; LDH: lactate dehydrogenase; AST: aspartate aminotransferase; ALT: alanine aminotransferase. Age and BMI are means ± SD, while transplant time, basal eGFR, admission eGFR, previous glycemia, CRP, LDH, lymphocytes, D-dimer, AST, and ALT are medians and IQR. Univariable and multivariable analyses are represented by odds ratios, 95% confidence intervals, and *P*-values, respectively.

**Table S7.** Risk factors for composite outcomes of mortality, or ICU or HD in kidney transplant recipients.

|                                | <b>Composite Outcome<br/>(n=150, 50%)</b> | <b>No Composite Outcome<br/>(n=150, 50%)</b> | <b>Univariable analysis</b>             | <b>Multivariable analysis</b>           |
|--------------------------------|-------------------------------------------|----------------------------------------------|-----------------------------------------|-----------------------------------------|
| <b>Demographic data</b>        |                                           |                                              |                                         |                                         |
| Age (years)                    | 56.1±11.9                                 | 48.8±11.4                                    | 1.06 (1.033-1.077, <b>p&lt;0.0001</b> ) | 1.04 (1.020-1.067, <b>p&lt;0.0001</b> ) |
| Male (n, %)                    | 85 (56.7)                                 | 87 (58.0)                                    | 0.95 (0.599-1.496, p=0.815)             |                                         |
| Race (n, %)                    |                                           |                                              |                                         |                                         |
| White                          | 94 (62.7)                                 | 90 (60.0)                                    | 1.12 (0.703-1.781, p=0.635)             |                                         |
| Black/brown                    | 51 (34.0)                                 | 59 (39.3)                                    |                                         |                                         |
| Transplant time (months)       | 84 (34.3;137)                             | 71.5 (32.3;142.8)                            | 1.00 (0.997-1.003, p=0.957)             |                                         |
| Donor type (n, %)              |                                           |                                              |                                         |                                         |
| Living                         | 40 (26.7)                                 | 45 (30.0)                                    | 1.18 (0.713-1.949, p=0.522)             |                                         |
| Deceased                       | 110 (73.3)                                | 105 (70.0)                                   |                                         |                                         |
| BMI (kg/m <sup>2</sup> )       | 27.1±4.9                                  | 26.7±4.8                                     | 1.02 (0.970-1.068, p=0.467)             |                                         |
| BMI ≥ 25 (n, %)                | 59 (39.3)                                 | 61 (40.7)                                    | 0.92 (0.575-1.475, p=0.733)             |                                         |
| BMI ≥ 30 (n, %)                | 36 (24.0)                                 | 29 (19.3)                                    | 1.31 (0.752-2.286, p=0.340)             |                                         |
| HTN (n, %)                     | 122 (81.3)                                | 103 (68.7)                                   | 1.99 (1.163-3.399, <b>p=0.012</b> )     | 1.62 (0.909-2.898, p=0.102)             |
| DM (n, %)                      | 70 (46.7)                                 | 47 (31.3)                                    | 1.92 (1.197-3.071, <b>p=0.007</b> )     | 1.25 (0.739-2.125, p=0.403)             |
| COPD (n, %)                    | 6 (4.0)                                   | 3 (2.0)                                      | 2.04 (0.501-8.319, p=0.319)             |                                         |
| Heart disease (n, %)           | 24 (16.0)                                 | 8 (5.3)                                      | 3.38 (1.466-7.795, <b>p=0.004</b> )     | 1.84 (0.759-4.476, p=0.177)             |
| Neoplasia (n, %)               | 15 (10.0)                                 | 6 (4.0)                                      | 2.67 (1.005-7.073, <b>p=0.049</b> )     | 1.59 (0.534-4.710, p=0.406)             |
| Liver disease (n, %)           | 8 (5.3)                                   | 1 (0.7)                                      | 8.39 (1.037-67.971, <b>p=0.046</b> )    | 4.46 (0.520-38.257, p=0.173)            |
| Autoimmune disease (n, %)      | 6 (4.0)                                   | 0 (0)                                        | - (-, p=0.999)                          |                                         |
| Smoking (n, %)                 | 37 (24.7)                                 | 25 (16.7)                                    | 1.53 (0.852-2.747, p=0.154)             |                                         |
| <b>Laboratory data</b>         |                                           |                                              |                                         |                                         |
| Basal eGFR                     | 43 (25.1;58.7)                            | 50.1 (35.4;66.9)                             | 0.99 (0.980-0.999, <b>p=0.026</b> )     | 1.00 (0.978-1.024, p=0.945)             |
| Admission eGFR                 | 26 (14.9;44.3)                            | 41.3 (26.8;54.7)                             | 0.98 (0.966-0.988, <b>p&lt;0.0001</b> ) | 0.97 (0.942-0.995, <b>p=0.019</b> )     |
| Previous glycemia (mg/dL)      | 104 (89;148.8)                            | 92 (82;105)                                  | 1.01 (1.004-1.013, <b>p=0.001</b> )     | 1.00 (0.995-1.008, p=0.566)             |
| CRP (mg/dL)                    | 9.7 (3.8;16.9)                            | 3.7 (1.2;9.5)                                | 1.08 (1.044-1.121, <b>p&lt;0.0001</b> ) | 1.01 (0.947-1.079, p=0.749)             |
| LDH (U/L)                      | 345 (238;466.8)                           | 250 (201;309.5)                              | 1.01 (1.003-1.007, <b>p&lt;0.0001</b> ) | 1.01 (1.000-1.009, <b>p=0.035</b> )     |
| Lymphocytes (mm <sup>3</sup> ) | 594 (391.8;958.5)                         | 877 (632;1206)                               | 1.00 (0.999-1.000, p=0.051)             | 1.00 (0.999-1.000, p=0.111)             |
| D-dimer (µg/L)                 | 1.5 (0.7;2.7)                             | 0.9 (0.5;1.7)                                | 1.17 (1.050-1.297, <b>p=0.004</b> )     | 1.41 (1.043-1.918, <b>p=0.026</b> )     |
| AST (U/L)                      | 31 (20.5;42)                              | 28 (21.3;38.8)                               | 1.01 (0.999-1.018, p=0.093)             | 0.99 (0.976-1.012, p=0.487)             |
| ALT (U/L)                      | 22 (14;31)                                | 21 (15;32.5)                                 | 1.00 (0.989-1.009, p=0.814)             |                                         |

BMI: body mass index; HTN: hypertension; DM: diabetes mellitus; COPD: chronic obstructive pulmonary disease; eGFR: estimated glomerular filtration rate (in mL/min/1.73 m<sup>2</sup>); CRP: C-reactive protein; LDH: lactate dehydrogenase; AST: aspartate aminotransferase; ALT: alanine aminotransferase. Age and BMI are means ± SD, while transplant time, basal eGFR, admission eGFR, previous glycemia, CRP, LDH, lymphocytes, D-dimer, AST, and ALT are medians and IQR. Univariable and multivariable analyses are represented by odds ratios, 95% confidence intervals, and *P*-values, respectively.



Risk factors for mortality, ICU admission, and HD requirement in kidney transplant recipients without hypertension (HTN).

**Table S8.** Risk factors for mortality in kidney transplant recipients without hypertension (HTN).

|                                | NOT ALIVE<br>(n=15, 20%) | ALIVE<br>(n=60, 80%) | Univariable Analysis                | Multivariable Analysis              |
|--------------------------------|--------------------------|----------------------|-------------------------------------|-------------------------------------|
| <b>Demographic Data</b>        |                          |                      |                                     |                                     |
| Age (years)                    | 59.8±13.3                | 48.0±13.3            | 1.07 (1.018-1.116, <b>p=0.006</b> ) | 1.05 (1.006-1.104, <b>p=0.026</b> ) |
| Male (n, %)                    | 10 (66.7)                | 26 (43.3)            | 2.62 (0.797-8.586, p=0.113)         |                                     |
| Race (n, %)                    |                          |                      |                                     |                                     |
| White                          | 9 (60.0)                 | 41 (68.3)            | 1.30 (0.689-2.451, p=0.418)         |                                     |
| Black/brown                    | 6 (40.0)                 | 19 (31.7)            |                                     |                                     |
| Transplant time (months)       | 109 (69;176)             | 92 (37.5;139.8)      | 1.00 (0.996-1.012, p=0.370)         |                                     |
| Donor type (n, %)              |                          |                      |                                     |                                     |
| Living                         | 6 (40.0)                 | 21 (35.0)            | 0.81 (0.253-2.580, p=0.718)         |                                     |
| Deceased                       | 9 (60.0)                 | 39 (65.0)            |                                     |                                     |
| BMI (kg/m <sup>2</sup> )       | 26.3±5.9                 | 26.0±5.2             | 1.01 (0.906-1.125, p=0.866)         |                                     |
| BMI ≥ 25 (n, %)                | 6 (40.0)                 | 21 (35.0)            | 1.05 (0.3253-3.72-, p=0.938)        |                                     |
| BMI ≥ 30 (n, %)                | 4 (26.7)                 | 9 (15.0)             | 1.90 (0.482-7.163, p=0.368)         |                                     |
| DM (n, %)                      | 6 (40.0)                 | 11 (18.3)            | 2.97 (0.874-10.085, p=0.081)        | 2.33 (0.600-9.054, p=0.221)         |
| COPD (n, %)                    | 1 (6.7)                  | 1 (1.7)              | 4.21 (0.248-71.584, p=0.320)        |                                     |
| Heart disease (n, %)           | 1 (6.7)                  | 1 (1.7)              | 4.21 (0.248-71.584, p=0.320)        |                                     |
| Neoplasia (n, %)               | 3 (20.0)                 | 3 (5.0)              | 4.75 (0.853-26.450, p=0.075)        | 4.01 (0.614-26.213, p=0.147)        |
| Autoimmune disease (n, %)      | 1 (6.7)                  | 1 (1.7)              | 4.21 (0.248-71.584, p=0.320)        |                                     |
| Smoking (n, %)                 | 4 (26.7)                 | 10 (16.7)            | 1.73 (0.442-6.804, p=0.430)         |                                     |
| <b>Laboratory Data</b>         |                          |                      |                                     |                                     |
| Basal eGFR                     | 36 (28;54)               | 51 (35;66)           | 0.98 (0.948-1.006, p=0.119)         |                                     |
| Admission eGFR                 | 24 (19;34)               | 41 (22;58)           | 0.96 (0.930-0.995, <b>p=0.023</b> ) | 0.97 (0.924-1.018, p=0.217)         |
| Previous glycemia (mg/dL)      | 104 (85;127.5)           | 92.5 (80.8;104.3)    | 1.00 (0.994-1.008, p=0.777)         |                                     |
| CRP (mg/dL)                    | 10.5 (7.3;15.5)          | 5.0 (0.7;8.8)        | 1.10 (1.015-1.201, <b>p=0.021</b> ) | 0.96 (0.816-1.132, p=0.637)         |
| LDH (U/L)                      | 341 (293.5;390.5)        | 241.5 (178.5;322.5)  | 1.01 (1.001-1.009, <b>p=0.019</b> ) | 1.01 (0.996-1.024, p=0.169)         |
| Lymphocytes (mm <sup>3</sup> ) | 700.5 (410;890.3)        | 895 (601;1176.5)     | 1.00 (0.997-1.000, p=0.112)         |                                     |
| D-dimer (µg/L)                 | 1.3 (0.9;2.5)            | 0.9 (0.5;1.6)        | 1.31 (0.957-1.793, p=0.092)         | 1.33 (0.851-2.079, p=0.210)         |
| AST (U/L)                      | 37 (32;69.3)             | 29 (22.8;40.8)       | 1.02 (0.999-1.043, p=0.066)         | 1.00 (0.959-1.035, p=0.839)         |
| ALT (U/L)                      | 26 (24;33)               | 19 (15.8;27.3)       | 1.01 (0.980-1.031, p=0.688)         |                                     |

HTN: hypertension; BMI: body mass index; COPD: chronic obstructive pulmonary disease; eGFR: estimated glomerular filtration rate (in mL/min/1.73 m<sup>2</sup>); CRP: C-reactive protein; LDH: lactate dehydrogenase; AST: aspartate aminotransferase; ALT: alanine aminotransferase. Age and BMI are means ± SD, while transplant time, basal eGFR, admission eGFR, previous glycemia, CRP, LDH, lymphocytes, D-dimer, AST, and ALT are medians and IQR. Univariable and multivariable analyses are represented by odds ratios, 95% confidence intervals, and *P*-values, respectively.

**Table S9.** Risk factors for intensive care unit (ICU) admission in kidney transplant recipients without hypertension (HTN).

|                           | ICU<br>(n=26, 34.7%) | NO ICU<br>(n=49, 65.3%) | Univariable Analysis          | Multivariable Analysis       |
|---------------------------|----------------------|-------------------------|-------------------------------|------------------------------|
| Demographic Data          |                      |                         |                               |                              |
| Age (years)               | 54.5±14.0            | 48.2±13.7               | 1.03 (0.998-1.071, p=0.067)   | 1.02 (0.987-1.063, p=0.201)  |
| Male (n, %)               | 14 (53.8)            | 22 (44.9)               | 1.43 (0.551-3.720, p=0.461)   |                              |
| Race (n, %)               |                      |                         |                               |                              |
| White                     | 18 (69.2)            | 32 (65.3)               | 1.01 (0.577-1.761, p=0.979)   | 4.55 (1.392-14.847, p=0.012) |
| Black/brown               | 8 (30.8)             | 17 (34.7)               |                               |                              |
| Transplant time (months)  | 81.5 (30.8;129.3)    | 106 (46;148)            | 1.00 (0.990-1.004, p=0.442)   |                              |
| Donor type (n, %)         |                      |                         |                               |                              |
| Living                    | 11 (42.3)            | 16 (32.7)               | 0.66 (0.248-1.763, p=0.408)   |                              |
| Deceased                  | 15 (57.7)            | 33 (67.3)               |                               |                              |
| BMI (kg/m²)               | 26.9±5.7             | 25.5±5.0                | 1.05 (0.957-1.156, p=0.295)   |                              |
| BMI ≥ 25 (n, %)           | 9 (34.6)             | 18 (36.7)               | 0.81 (0.295-2.240, p=0.688)   |                              |
| BMI ≥ 30 (n, %)           | 6 (23.1)             | 7 (14.3)                | 1.71 (0.505-5.816, p=0.387)   |                              |
| DM (n, %)                 | 11 (42.3)            | 6 (12.2)                | 5.26 (1.655-16.688, p=0.005)  |                              |
| COPD (n, %)               | 1 (3.8)              | 1 (2.0)                 | 1.92 (0.115-32.008, p=0.650)  |                              |
| Heart disease (n, %)      | 1 (3.8)              | 1 (2.0)                 | 1.92 (0.115-32.008, p=0.650)) |                              |
| Neoplasia (n, %)          | 4 (15.4)             | 2 (4.1)                 | 4.27 (0.727-25.117, p=0.108)  |                              |
| Autoimmune disease (n, %) | 2 (7.7)              | 0 (0)                   | - (-, p=0.999)                |                              |
| Smoking (n, %)            | 5 (19.2)             | 9 (18.4)                | 0.93 (0.268-3.198, p=0.903)   |                              |
| Laboratory Data           |                      |                         |                               |                              |
| Basal eGFR                | 47 (35;56)           | 49 (32;66)              | 0.99 (0.971-1.017, p=0.591)   | 1.01 (1.001-1.011, p=0.012)  |
| Admission eGFR            | 29 (21;41)           | 42 (22;57)              | 0.98 (0.961-1.006, p=0.146)   |                              |
| Previous glycemia (mg/dL) | 102.5 (87.8;131.8)   | 89 (80;103)             | 1.00 (0.996-1.009, p=0.505)   |                              |
| CRP (mg/dL)               | 8.8 (5.1;12.2)       | 3.7 (0.4;9.1)           | 1.05 (0.980-1.130, p=0.159)   |                              |
| LDH (U/L)                 | 341 (275.5;412)      | 225.5 (175.8;298.8)     | 1.01 (1.002-1.012, p=0.004)   |                              |
| Lymphocytes (mm³)         | 548.5 (378.8;864.8)  | 931 (729;1206)          | 1.00 (0.997-1.000, p=0.017)   |                              |
| D-dimer (µg/L)            | 1.3 (0.7;2.0)        | 0.9 (0.5;1.6)           | 1.05 (0.812-1.358, p=0.710)   |                              |
| AST (U/L)                 | 36 (26;63)           | 30 (23;43)              | 1.01 (0.993-1.030, p=0.238)   |                              |
| ALT (U/L)                 | 20 (16.3;31.5)       | 21 (16;28)              | 0.99 (0.964-1.018, p=0.502)   |                              |

HTN: hypertension; BMI: body mass index; COPD: chronic obstructive pulmonary disease; eGFR: estimated glomerular filtration rate (in mL/min/1.73 m<sup>2</sup>); CRP: C-reactive protein; LDH: lactate dehydrogenase; AST: aspartate aminotransferase; ALT: alanine aminotransferase. Age and BMI are means ± SD, while transplant time, basal eGFR, admission eGFR, previous glycemia, CRP, LDH, lymphocytes, D-dimer, AST, and ALT are medians and IQR. Univariable and multivariable analyses are represented by odds ratios, 95% confidence intervals, and *P*-values, respectively.

**Table S10.** Risk factors for the need for hemodialysis (HD) in kidney transplant recipients without hypertension (HTN).

|                                | HD<br>(n=18, 24.0%) | NO HD<br>(n=57, 76.0%) | Univariable Analysis                | Multivariable Analysis              |
|--------------------------------|---------------------|------------------------|-------------------------------------|-------------------------------------|
| <b>Demographic Data</b>        |                     |                        |                                     |                                     |
| Age (years)                    | 51.5±14.9           | 50.0±13.9              | 1.01 (0.970-1.046, p=0.691)         |                                     |
| Male (n, %)                    | 10 (55.6)           | 26 (45.6)              | 1.49 (0.513-3.327, p=0.463)         |                                     |
| Race (n, %)                    |                     |                        |                                     |                                     |
| White                          | 13 (72.2)           | 37 (64.9)              | 0.87 (0.458-1.658, p=0.676)         |                                     |
| Black/brown                    | 5 (27.8)            | 20 (35.1)              |                                     |                                     |
| Transplant time (months)       | 77.5 (24.3;126.8)   | 105 (46;148)           | 1.00 (0.987-1.003, p=0.242)         |                                     |
| Donor type (n, %)              |                     |                        |                                     |                                     |
| Living                         | 7 (38.9)            | 20 (35.1)              | 0.85 (0.285-2.533, p=0.770)         |                                     |
| Deceased                       | 11 (61.1)           | 37 (64.9)              |                                     |                                     |
| BMI (kg/m <sup>2</sup> )       | 26.3±5.0            | 26.0±5.4               | 1.01 (0.916-1.123, p=0.789)         |                                     |
| BMI ≥ 25 (n, %)                | 6 (33.3)            | 21 (36.8)              | 0.71 (0.231-2.206, p=0.559)         |                                     |
| BMI ≥ 30 (n, %)                | 4 (22.2)            | 9 (15.8)               | 1.37 (0.363-5.127, p=0.645)         |                                     |
| DM (n, %)                      | 6 (33.3)            | 11 (19.3)              | 2.09 (0.642-6.807, p=0.221)         |                                     |
| COPD (n, %)                    | 1 (5.6)             | 1 (1.8)                | 3.29 (0.195-55.511, p=0.408)        |                                     |
| Heart disease (n, %)           | 1 (5.6)             | 1 (1.8)                | 3.29 (0.195-55.511, p=0.408)        |                                     |
| Neoplasia (n, %)               | 3 (16.7)            | 3 (5.3)                | 3.60 (0.658-19.696, p=0.140)        |                                     |
| Autoimmune disease (n, %)      | 1 (5.6)             | 1 (1.8)                | 3.29 (0.195-55.511, p=0.408)        |                                     |
| Smoking (n, %)                 | 3 (16.7)            | 11 (19.3)              | 0.66 (0.160-2.741, p=0.570)         |                                     |
| <b>Laboratory Data</b>         |                     |                        |                                     |                                     |
| Basal eGFR                     | 43 (30;52)          | 52 (34;66)             | 0.98 (0.953-1.007, p=0.141)         |                                     |
| Admission eGFR                 | 23 (10;29)          | 43 (26;59)             | 0.94(0.901-0.975, <b>p=0.001</b> )  | 0.94 (0.898-0.987, <b>p=0.012</b> ) |
| Previous glycemia (mg/dL)      | 102.5(93.8;117.3)   | 90 (80;103)            | 1.00 (0.995-1.008, p=0.700)         |                                     |
| CRP (mg/dL)                    | 10.4 (4.3;12.8)     | 5.1 (0.5;9.5)          | 1.05 (0.973-1.132, p=0.208)         |                                     |
| LDH (U/L)                      | 341.5 (256.8;457.3) | 263 (180;327)          | 1.01 (1.001-1.010, <b>p=0.009</b> ) | 1.01 (1.001-1.011, <b>p=0.020</b> ) |
| Lymphocytes (mm <sup>3</sup> ) | 597.5 (391.8;864.8) | 918 (632;1206)         | 1.00 (0.997-1.000, p=0.051)         | 1.00 (0.997-1.001, p=0.222)         |
| D-dimer (µg/L)                 | 1.2 (0.9;1.8)       | 0.9 (0.5;1.8)          | 0.95 (0.679-1.319, p=0.745)         |                                     |
| AST (U/L)                      | 34 (24;68)          | 31 (23.5;43)           | 1.01 (0.994-1.030, p=0.118)         |                                     |
| ALT (U/L)                      | 25 (16.5;31.5)      | 20 (16;28)             | 1.00 (0.967-1.026, p=0.793)         |                                     |

HTN: hypertension; BMI: body mass index; COPD: chronic obstructive pulmonary disease; eGFR: estimated glomerular filtration rate (in mL/min/1.73 m<sup>2</sup>); CRP: C-reactive protein; LDH: lactate dehydrogenase; AST: aspartate aminotransferase; ALT: alanine aminotransferase. Age and BMI are means ± SD, while transplant time, basal eGFR, admission eGFR, previous glycemia, CRP, LDH, lymphocytes, D-dimer, AST, and ALT are medians and IQR. Univariable and multivariable analyses are represented by odds ratios, 95% confidence intervals, and *P*-values, respectively.
